# Supplementary material for: Highly stretchable, self-healing, and 3D printing prefabricatable hydrophobic association hydrogels with the assistance of electrostatic interaction
Source: Royal Society of Chemistry journal article supplement (doi:10.1039/d0py00003e), 2020-01-01
Supplement: d0py00003e1.pdf [file d0py00003e1.pdf]

Supporting Information

**Highly Stretchable, Self-healing, and 3D Printing Prefabricatable  
Hydrophobic Association Hydrogels with Assistance of Electrostatic  
Interaction**

Heng Chen, Beibei Hao, Penghui Ge, Shaojun Chen\*

Shenzhen Key Laboratory of Polymer Science and Technology, Guangdong Research  
Center for Interfacial Engineering of Functional Materials, College of Materials  
Science and Engineering, Shenzhen University, Shenzhen 518060, China

Corresponding E-mail: chensj@szu.edu.cn.

**Table S1** GPC results of H60 under different irradiation time

| <b>Sample</b> | <b>Irradiation time</b> | <b>Photoinitiator</b> | <b>M<sub>n</sub></b> | <b>PDI</b> |
|---------------|-------------------------|-----------------------|----------------------|------------|
| H60-01        | 10 min                  | I2959                 | 48100                | 2.74       |
| H60-02        | 60 min                  | I2959                 | 78200                | 2.21       |

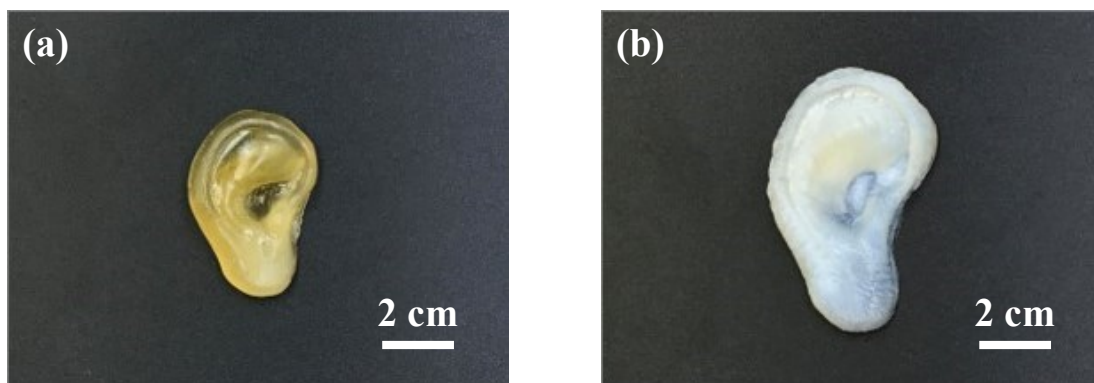

**Fig. S1** Photographs of auricular precursor (a) and auricular hydrogel (b).

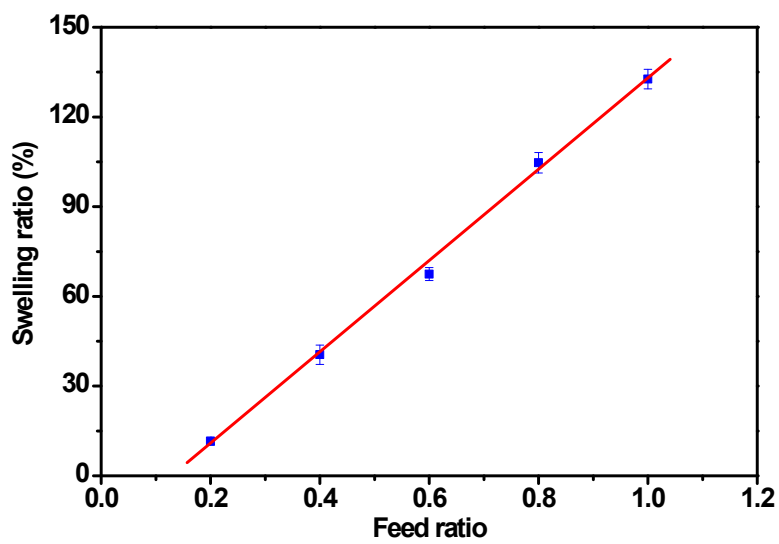

**Fig. S2** Swelling ratio of the hydrogels

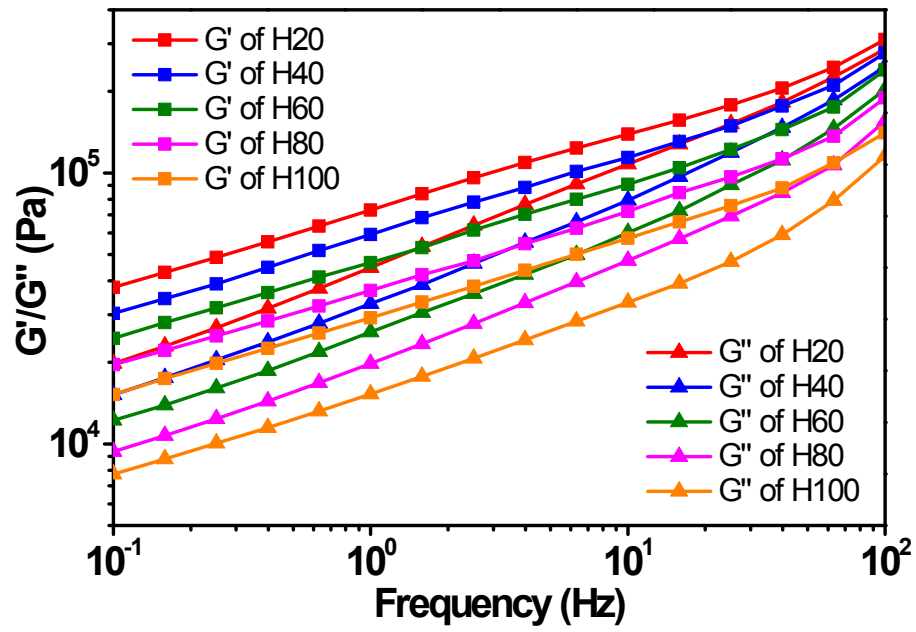

**Fig. S3** Oscillatory frequency-sweep of the hydrogel.

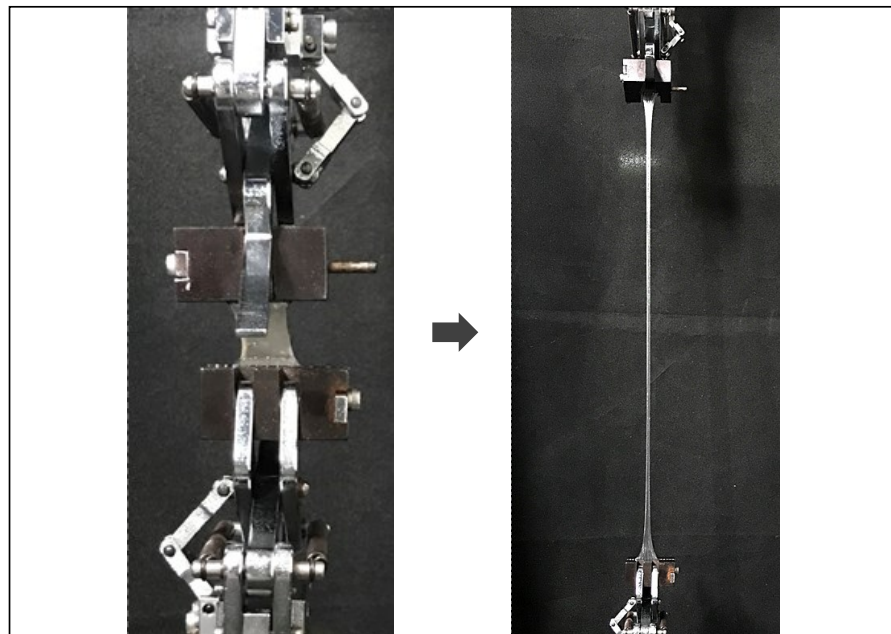

**Fig. S4** Photographs of the hydrogel under applied axial tension.

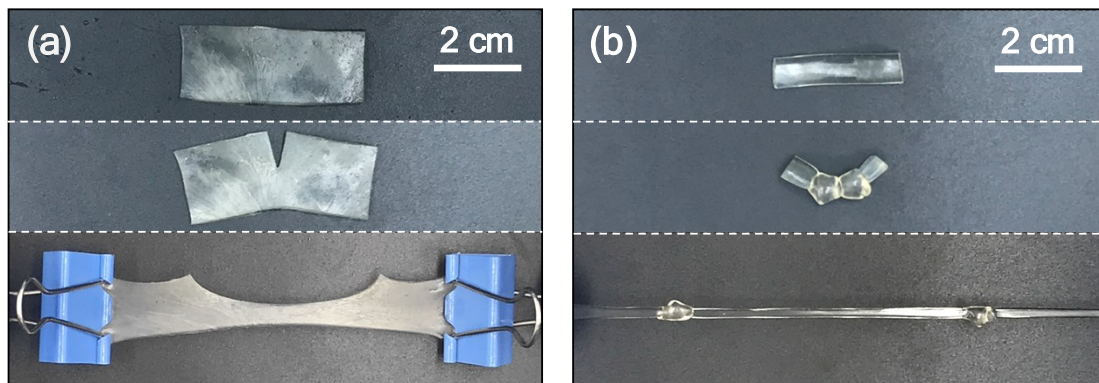

**Fig. S5** Photographs of the hydrogel under stretching with crack (a) and knotting (b).
